# Supplementary material for: The Challenge of Acute Kidney Injury Diagnostic Precision: From Early Prediction to Long-Term Follow-up
Source: PubMed Central journal article supplement — Kidney Int Rep. 2021 May 19;6(7):1755–7. doi: 10.1016/j.ekir.2021.05.006 (PMC8258574; doi:10.1016/j.ekir.2021.05.006), 2021-05-19
Supplement: mmc1.pdf [file mmc1.pdf]

## Supplemental References

- S1. Hanson HR, Carlisle MA, Bensman RS, *et al.* Early prediction of pediatric acute kidney injury from the emergency department: A pilot study. *Am J Emerg Med* 2021; **40**: 138-144.
- S2. Basu RK, Hackbarth R, Gillespie S, *et al.* Clinical phenotypes of acute kidney injury are associated with unique outcomes in critically ill septic children. *Pediatr Res* 2021.
- S3. Nguyen TC, Cruz MA, Carcillo JA. Thrombocytopenia-Associated Multiple Organ Failure and Acute Kidney Injury. *Crit Care Clin* 2015; **31**: 661-674.
- S4. Greenberg JH, Devarajan P, Thiessen-Philbrook HR, *et al.* Kidney injury biomarkers 5 years after AKI due to pediatric cardiac surgery. *Pediatr Nephrol* 2018; **33**: 1069-1077.
- S5. Cooper DS, Claes D, Goldstein SL, *et al.* Follow-Up Renal Assessment of Injury Long-Term After Acute Kidney Injury (FRAIL-AKI). *Clin J Am Soc Nephrol* 2016; **11**: 21-29.
- S6. Zappitelli M, Parikh CR, Kaufman JS, *et al.* Acute Kidney Injury and Risk of CKD and Hypertension after Pediatric Cardiac Surgery. *Clin J Am Soc Nephrol* 2020; **15**: 1403-1412.
- S7. Greenberg JH, Zappitelli M, Devarajan P, *et al.* Kidney Outcomes 5 Years After Pediatric Cardiac Surgery: The TRIBE-AKI Study. *JAMA Pediatr* 2016; **170**: 1071-1078.
- S8. Madsen NL, Goldstein SL, Froslev T, *et al.* Cardiac surgery in patients with congenital heart disease is associated with acute kidney injury and the risk of chronic kidney disease. *Kidney Int* 2017; **92**: 751-756.
- S9. Chawla LS, Bellomo R, Bihorac A, *et al.* Acute kidney disease and renal recovery: consensus report of the Acute Disease Quality Initiative (ADQI) 16 Workgroup. *Nat Rev Nephrol* 2017; **13**: 241-257.
- S10. Menon S, Kirkendall ES, Nguyen H, *et al.* Acute kidney injury associated with high nephrotoxic medication exposure leads to chronic kidney disease after 6 months. *J Pediatr* 2014; **165**: 522-527 e522.
